# Supplementary material for: Achieving water budget closure through physical hydrological process modelling: insights from a large-sample study
Source: Copernicus journal article supplement (doi:10.5194/hess-29-627-2025), 2025-02-04
Supplement: Supplementary file 1 [file hess-29-627-2025-supplement.pdf]

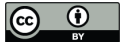

*Supplement of*

## **Achieving water budget closure through physical hydrological process modelling: insights from a large-sample study**

**Xudong Zheng et al.**

*Correspondence to:* Dengfeng Liu ([liudf@xaut.edu.cn](mailto:liudf@xaut.edu.cn)) and Shengzhi Huang ([huangshengzhi7788@126.com](mailto:huangshengzhi7788@126.com))

The copyright of individual parts of the supplement might differ from the article licence.

**Table S1.** Summary of the 18 excluded basins, including the id, location, area and excluded reasons.

| HRU ID   | Lat   | Lon     | Area (km <sup>2</sup> ) | Excluded reason                       |
|----------|-------|---------|-------------------------|---------------------------------------|
| 01118300 | 41.49 | -71.84  | 13.71                   | Data is missing between 1998 and 2010 |
| 01121000 | 41.87 | -72.17  | 94.70                   | Data is missing between 1998 and 2010 |
| 01187300 | 42.08 | -72.98  | 54.22                   | Data is missing between 1998 and 2010 |
| 01510000 | 42.69 | -75.81  | 382.93                  | Data is missing between 1998 and 2010 |
| 02125000 | 35.39 | -80.35  | 145.08                  | Incomplete observation in 2010        |
| 02202600 | 32.28 | -81.63  | 623.35                  | Data is missing between 1998 and 2010 |
| 03281100 | 37.05 | -83.75  | 425.26                  | Data is missing between 1998 and 2010 |
| 03300400 | 37.76 | -85.07  | 1128.56                 | Data is missing between 1998 and 2010 |
| 05062500 | 47.29 | -95.74  | 2435.96                 | Data is missing between 1998 and 2010 |
| 06154410 | 47.96 | -108.63 | 47.72                   | No observation in 2010                |
| 06291500 | 45.04 | -107.74 | 220.73                  | No observation in 2010                |
| 07290650 | 31.94 | -90.55  | 1694.64                 | Data is missing between 1998 and 2010 |
| 07295000 | 31.17 | -91.18  | 466.89                  | Data is missing between 1998 and 2010 |
| 08079600 | 33.24 | -101.86 | 3512.32                 | Data is missing between 1998 and 2010 |
| 09497800 | 34.04 | -110.51 | 751.79                  | Data is missing between 1998 and 2010 |
| 10173450 | 37.63 | -112.69 | 281.69                  | Data is missing between 1998 and 2010 |
| 12383500 | 47.14 | -113.92 | 17.70                   | Incomplete observation in 2010        |
| 12388400 | 47.24 | -114.40 | 76.56                   | Incomplete observation in 2010        |

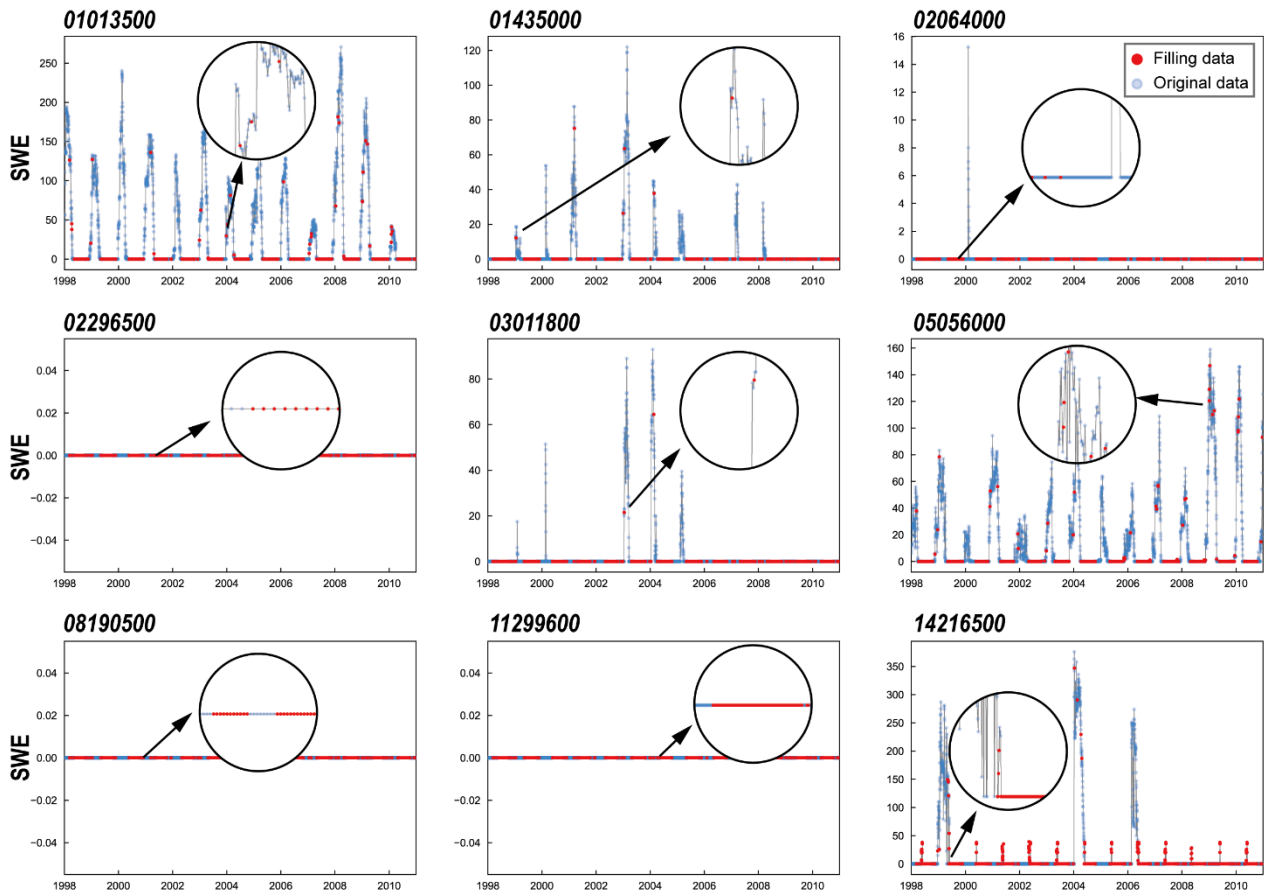

**Figure S1.** Schematic diagram of the gap filling process for GlobSnow SWE at nine randomly selected basins.

**Table S2.** Summary of the parameters settings in the PHPM-MDCF.

| Parameters     | Reference value | Reference range                               | Description                                                                    |
|----------------|-----------------|-----------------------------------------------|--------------------------------------------------------------------------------|
| $r_0$          | 0.5             | 0.3~0.6                                       | Initial correction rate.                                                       |
| Decay approach | Multiplicative  | Linear, exponential, and multiplicative decay | The method of reduction in correction rate following an unreliable simulation. |
| $\Delta r$     | 50%             | 30%~70%                                       | Decay rate of the correction rate.                                             |
| $Res_t$        | 10%             | 5%~20%                                        | Correction termination threshold for inconsistency residuals.                  |
| $r_t$          | 4%              | 1%~10%                                        | Correction termination threshold for correction rate.                          |

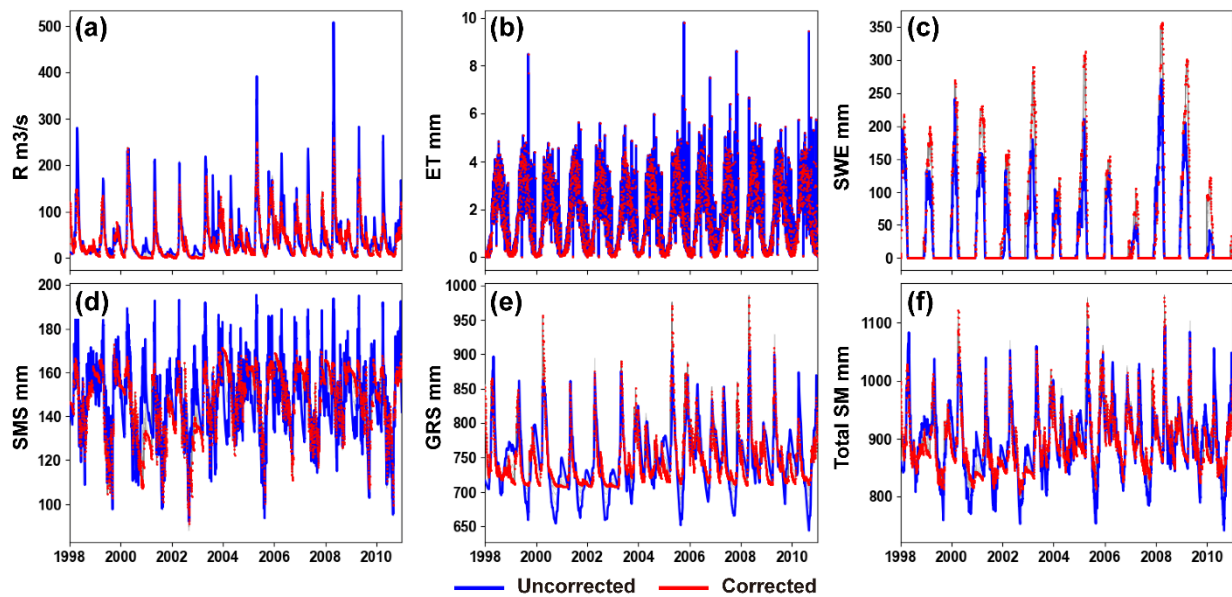

**Figure S2.** Time series of water budget variables before and after correction at basin 1013500. Note the total SM is the combination of SMS and GRS.

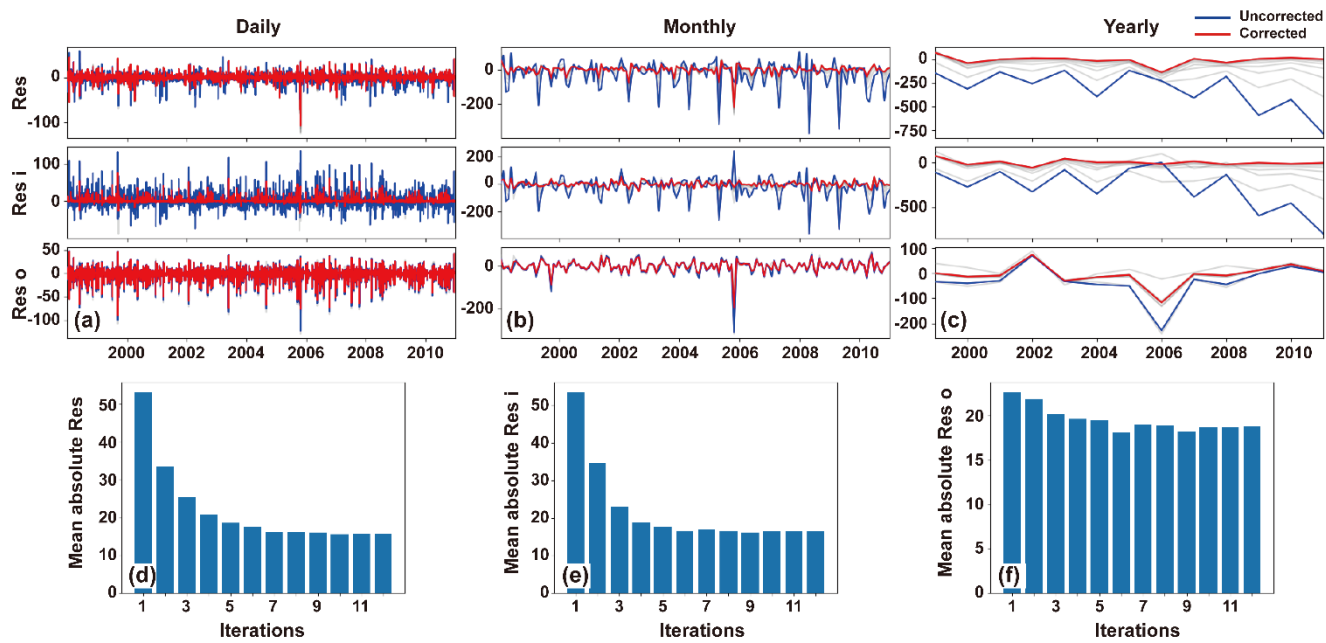

20 **Figure S3.** Same as Fig. 6, but for basin 1137500.

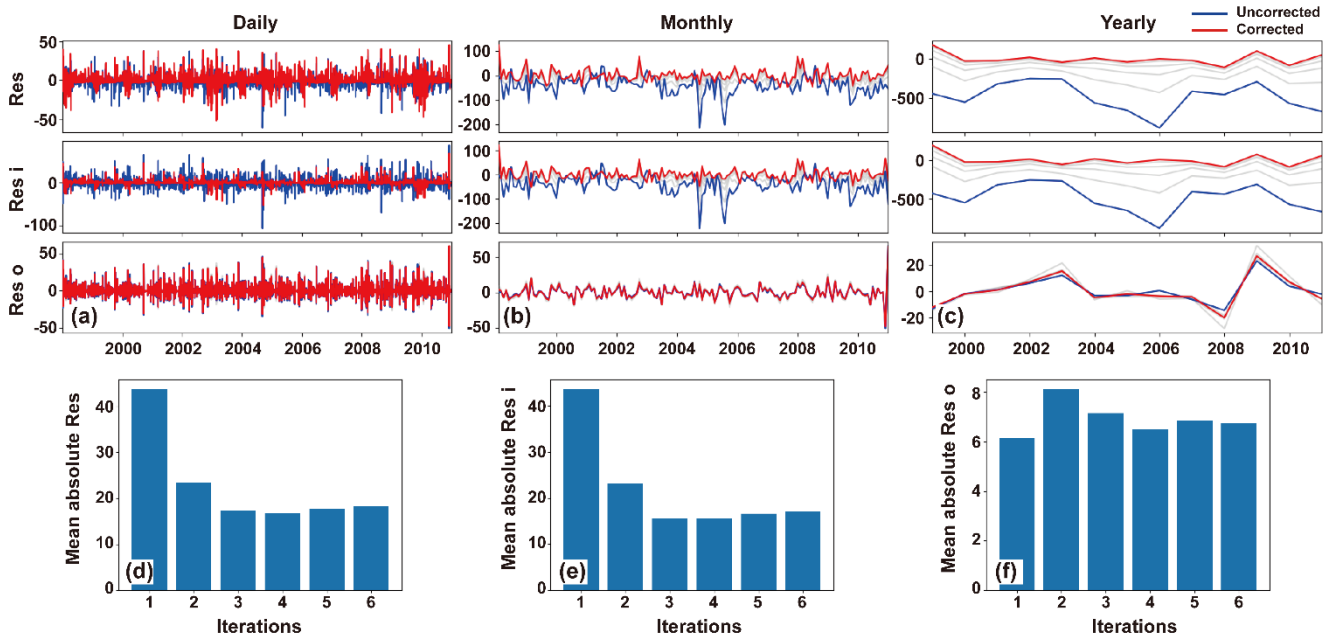

Figure S4. Same as Fig. 6, but for basin 2177000.

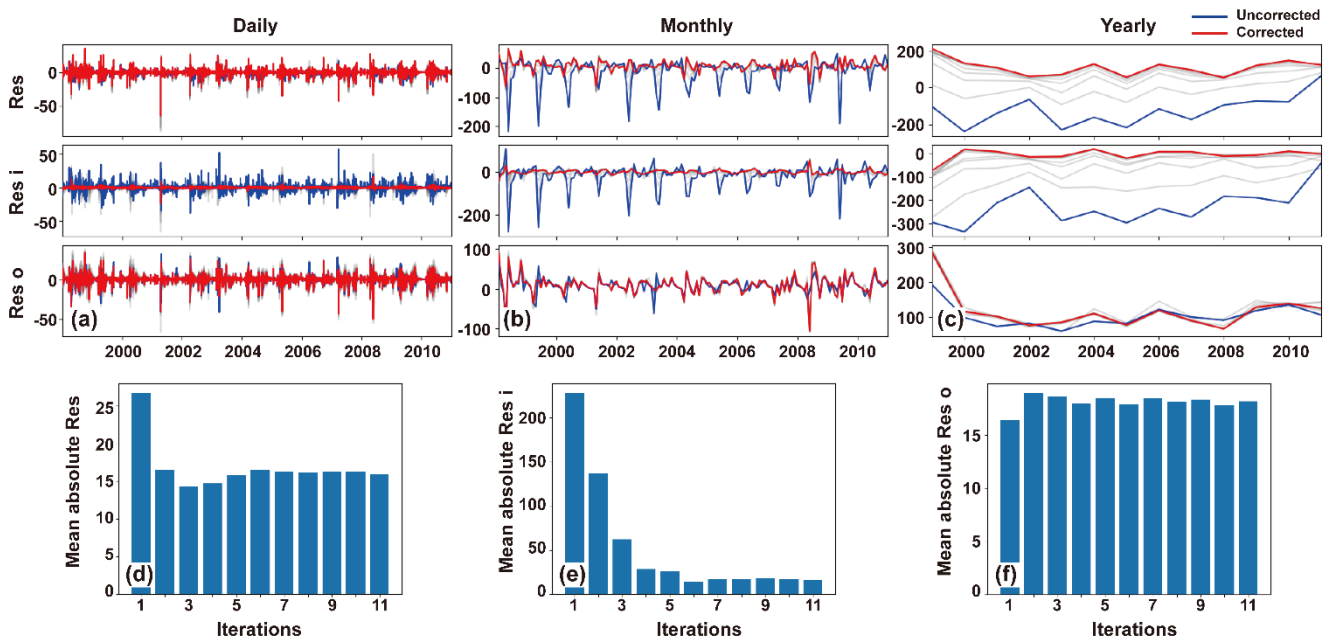

Figure S5. Same as Fig. 6, but for basin 6311000.

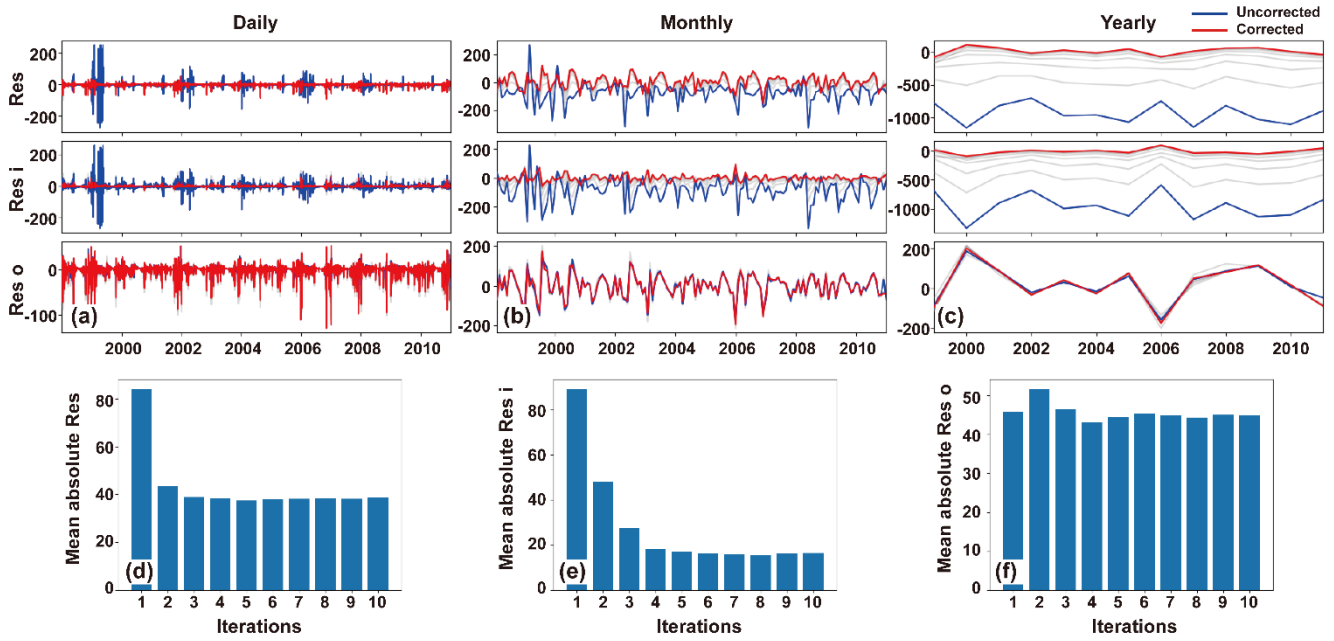

25

Figure S6. Same as Fig. 6, but for basin 14092750.

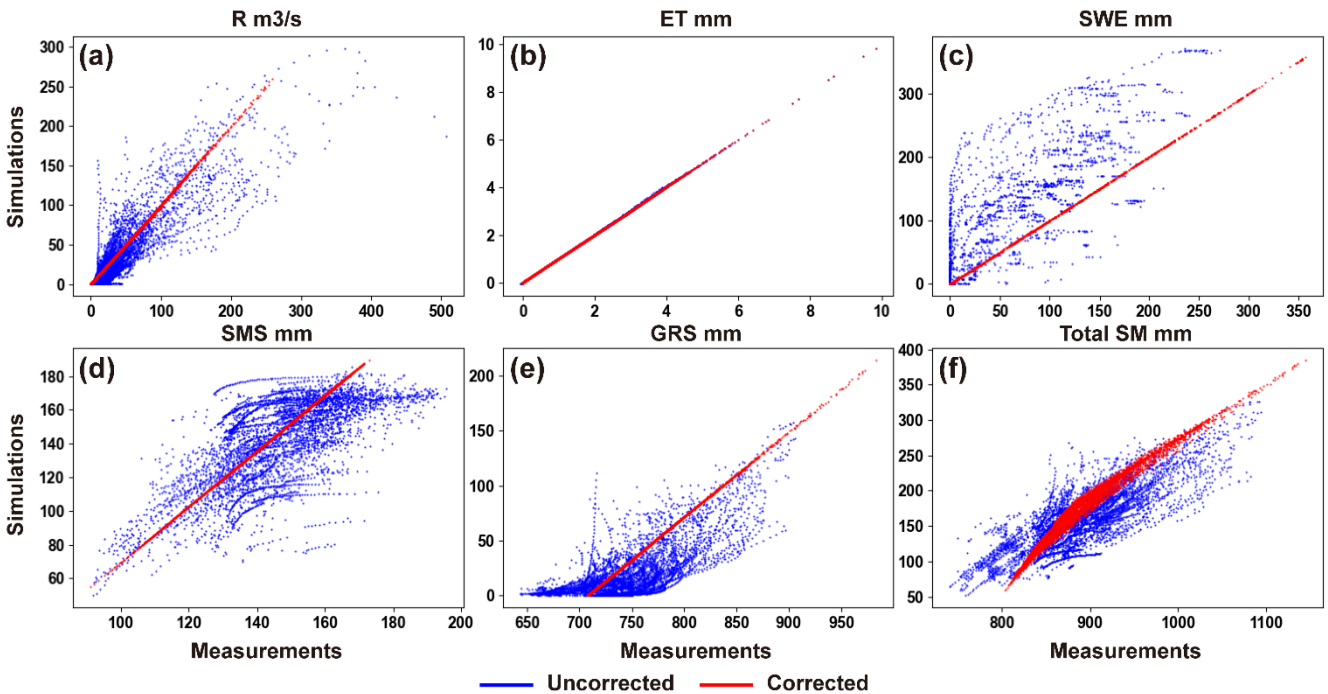

Figure S7. Scatter plots comparing measurements and simulation before and after correction at basin 1013500.

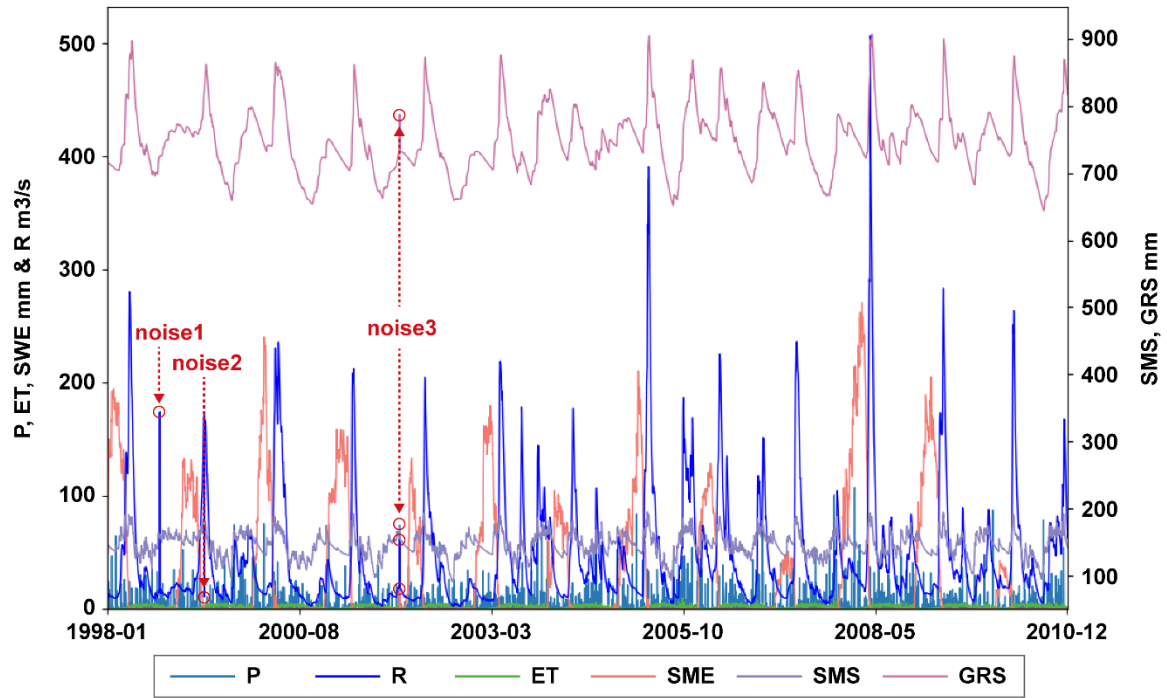

30 **Figure S8.** Noise sequence (NS1) generated by adding three single-point noises, corresponds to noise experiments 1-3.

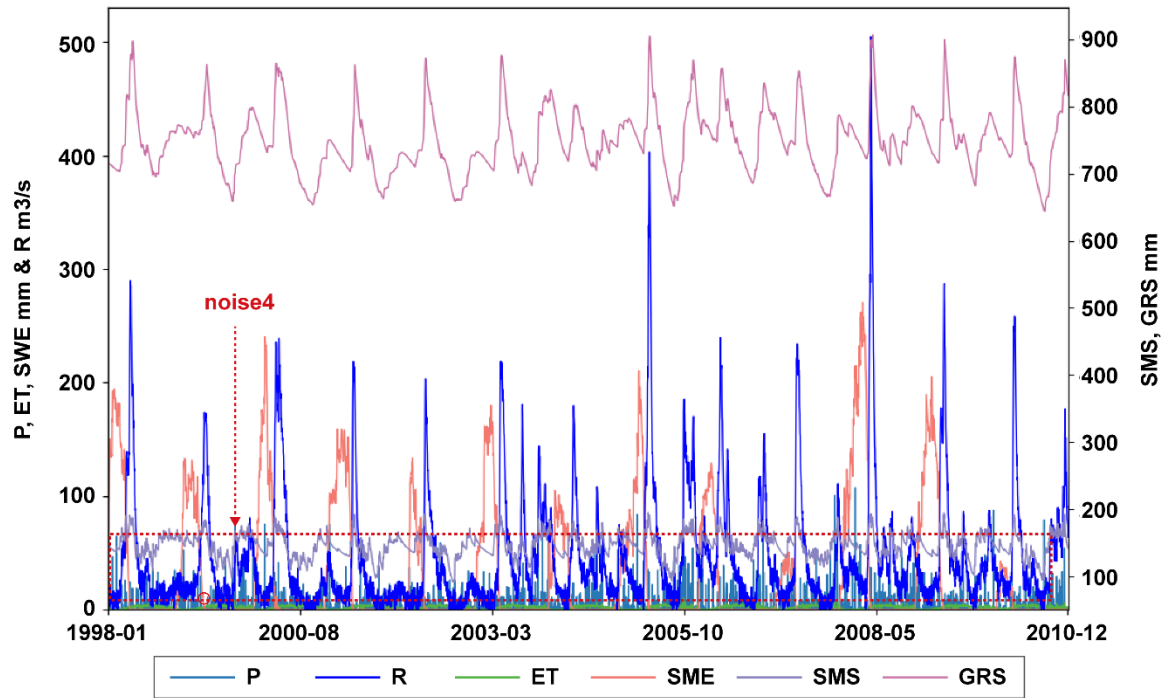

**Figure S9.** Noise sequence (NS2) generated by adding a Gaussian white noise sequence into the runoff, corresponds to noise experiment 4.

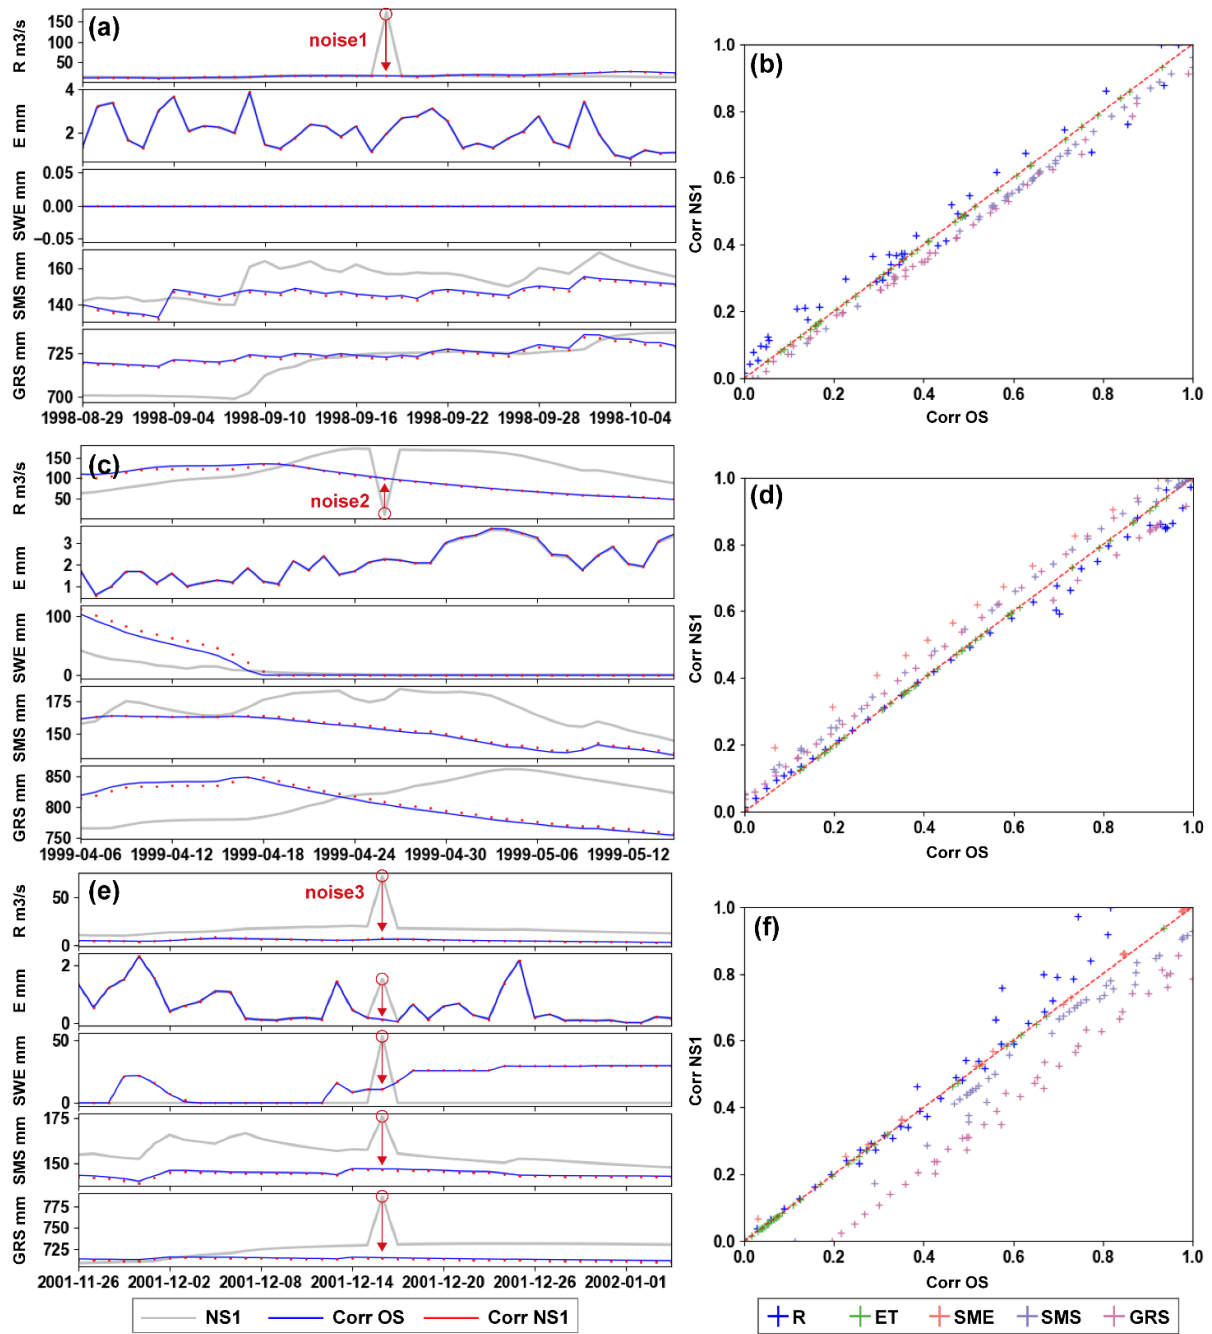

**Figure S10.** Correction results for multisource datasets around noises 1-3. Panels in the left column depict the time series of OS-based and NS1-based correction (Corr OS and Corr NS1), while panels in the right column compare them in terms of standardized values.



**Table S3.** Summary of datasets from Lehmann et al. (2022).

| Variable                  | Product               | Original Resolution |           | Original Period |
|---------------------------|-----------------------|---------------------|-----------|-----------------|
|                           |                       | Spatial             | Temporal  |                 |
| Precipitation             | CPC                   | 0.5°×0.5°           | Monthly   | 2002-2017       |
|                           | CRU                   | 0.5°×0.5°           | Monthly   | 1901-2019       |
|                           | ERA5 Land             | 0.1°×0.1°           | Monthly   | 1981-2020       |
|                           | PGF                   | 1.0°×1.0°           | Monthly   | 1948-2014       |
|                           | GPCC                  | 0.5°×0.5°           | Monthly   | 1891-2016       |
|                           | GPCP                  | 2.5°×2.5°           | Monthly   | 1979-2020       |
|                           | GPM                   | 0.1°×0.1°           | Monthly   | 2000-2020       |
|                           | JRA55                 | 0.5°×0.5°           | Monthly   | 1959-2020       |
|                           | MERRA2                | 0.5°×0.625°         | Monthly   | 1980-2020       |
|                           | MSWEP                 | 0.5°×0.5°           | Monthly   | 1979-2020       |
|                           | TRMM                  | 0.25°×0.25°         | Monthly   | 1998-present    |
| Evaporation               | ERA5 Land             | 0.1°×0.1°           | Monthly   | 1981-2020       |
|                           | FLUXCOM               | 0.5°×0.5°           | Monthly   | 2001-2015       |
|                           | GLDAS22 CLSM          | 0.25°×0.25°         | Daily     | 2003-2020       |
|                           | GLDAS20 CLSM/NOAH/VIC | 1.0°×1.0°           | Monthly   | 1979-2014       |
|                           | GLDAS21 NOAH/CLSM/VIC | 1.0°×1.0°           | Monthly   | 2000-2020       |
|                           | GLEAM                 | 0.25°×0.25°         | Monthly   | 1980-2018       |
|                           | JRA55                 | 0.5°×0.5°           | Monthly   | 1959-2020       |
|                           | MERRA2                | 0.5°×0.625°         | Monthly   | 1980-2020       |
|                           | MOD16                 | 0.5°×0.5°           | Monthly   | 2000-2014       |
|                           | SEBBop                | 0.5°×0.5°           | Monthly   | 2003-2020       |
|                           | Runoff                | ERA5 Land           | 0.1°×0.1° | Monthly         |
| GLDAS22 CLSM              |                       | 0.25°×0.25°         | Daily     | 2003-2020       |
| GLDAS20 CLSM/NOAH/VIC     |                       | 1.0°×1.0°           | Monthly   | 1979-2014       |
| GLDAS21 CLSM/NOAH/VIC     |                       | 1.0°×1.0°           | Monthly   | 2000-2020       |
| GRUN                      |                       | 0.5°×0.5°           | Monthly   | 1902-2014       |
| JRA55                     |                       | 0.5°×0.5°           | Monthly   | 1959-2020       |
| MERRA5                    |                       | 0.5°×0.625°         | Monthly   | 1980-2020       |
| Terrestrial water storage | GRACE JPL mascons     | 0.5°×0.5°           | Monthly   | 2002-present    |
|                           | GRACE CSR mascons     | 0.5°×0.5°           | Monthly   | 2002-present    |

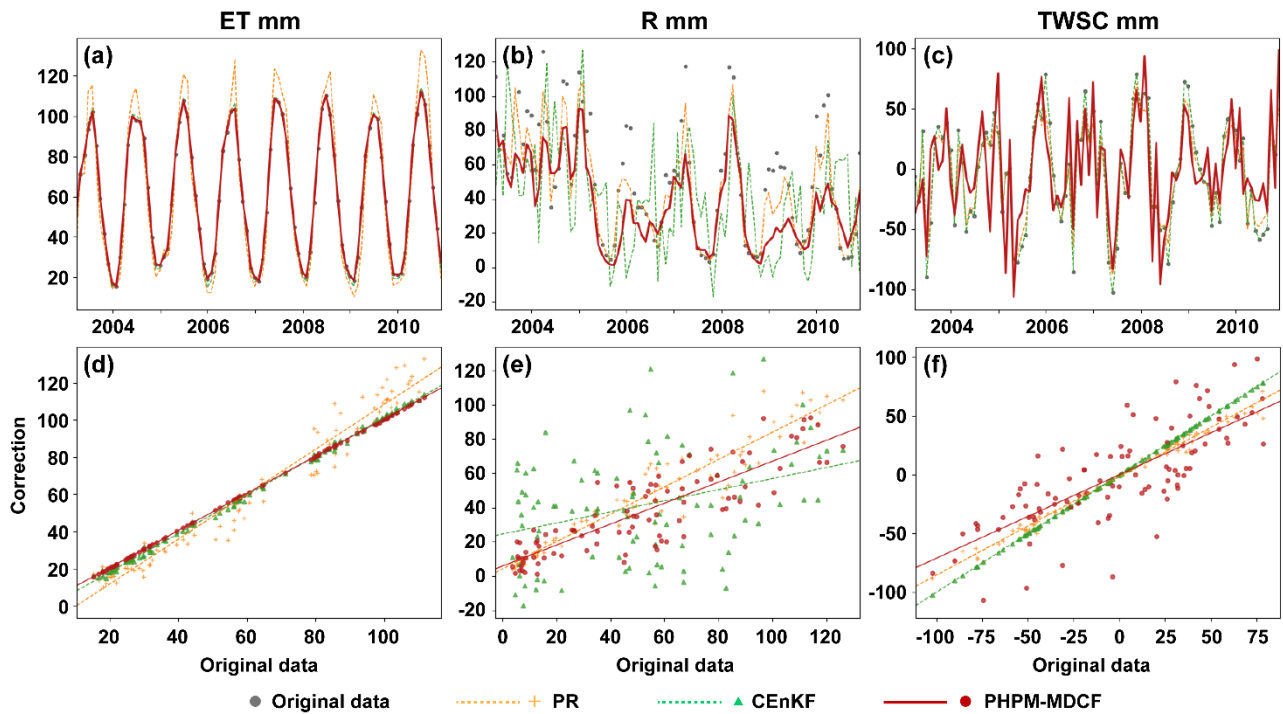

40 **Figure S11.** Same as Fig. 11, but for basin 1557500.

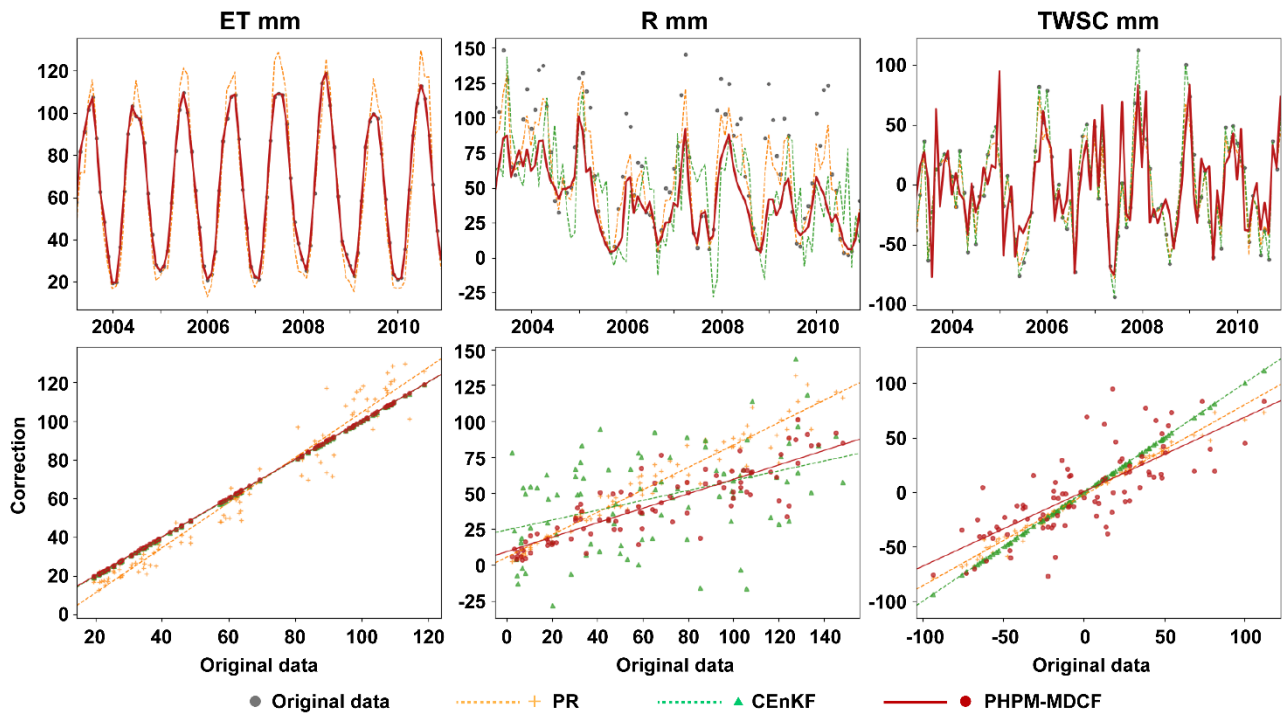

**Figure S12.** Same as Fig. 11, but for basin 3070500.

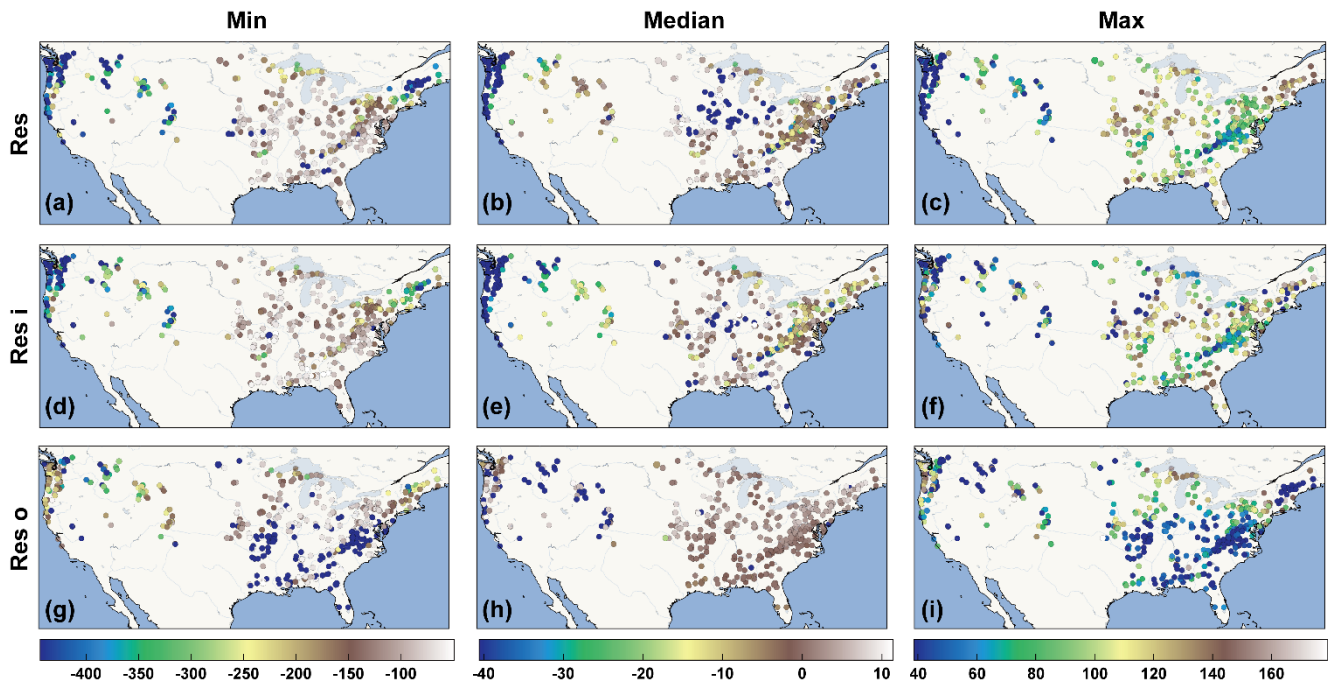

Figure S13. Same as Fig. 4, but for residuals decomposition excluding SWE.

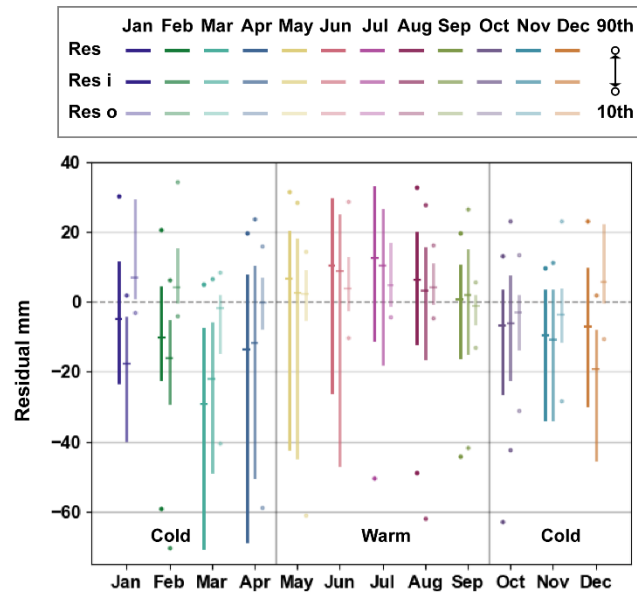

45

Figure S14. Same as Fig. 5, but for residuals decomposition excluding SWE.

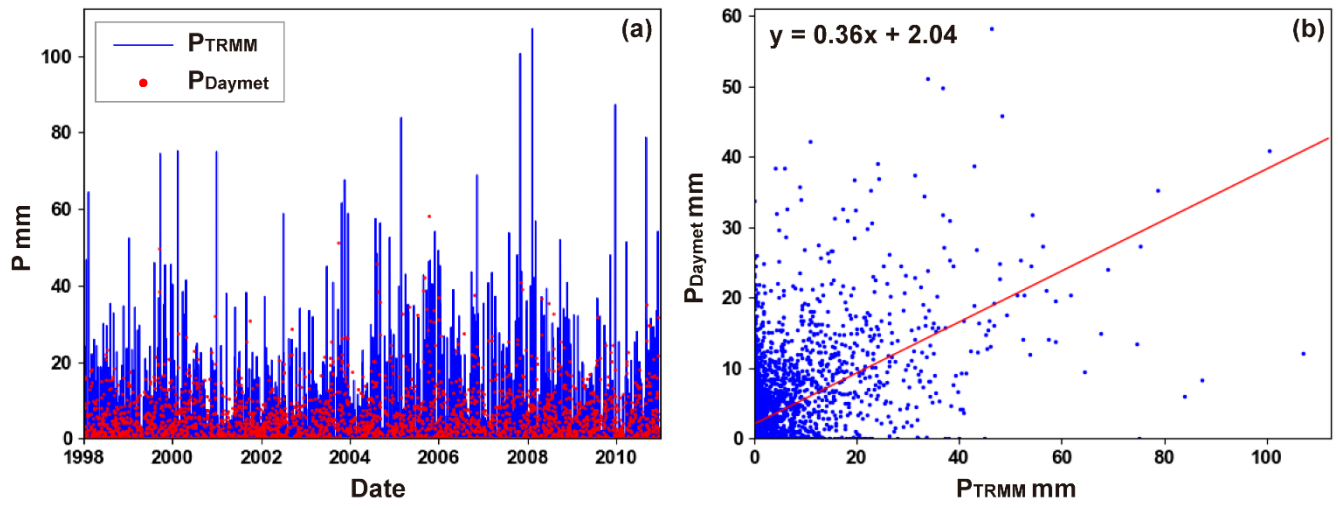

Figure S15. Comparison of TRMM and Daymet precipitation products.

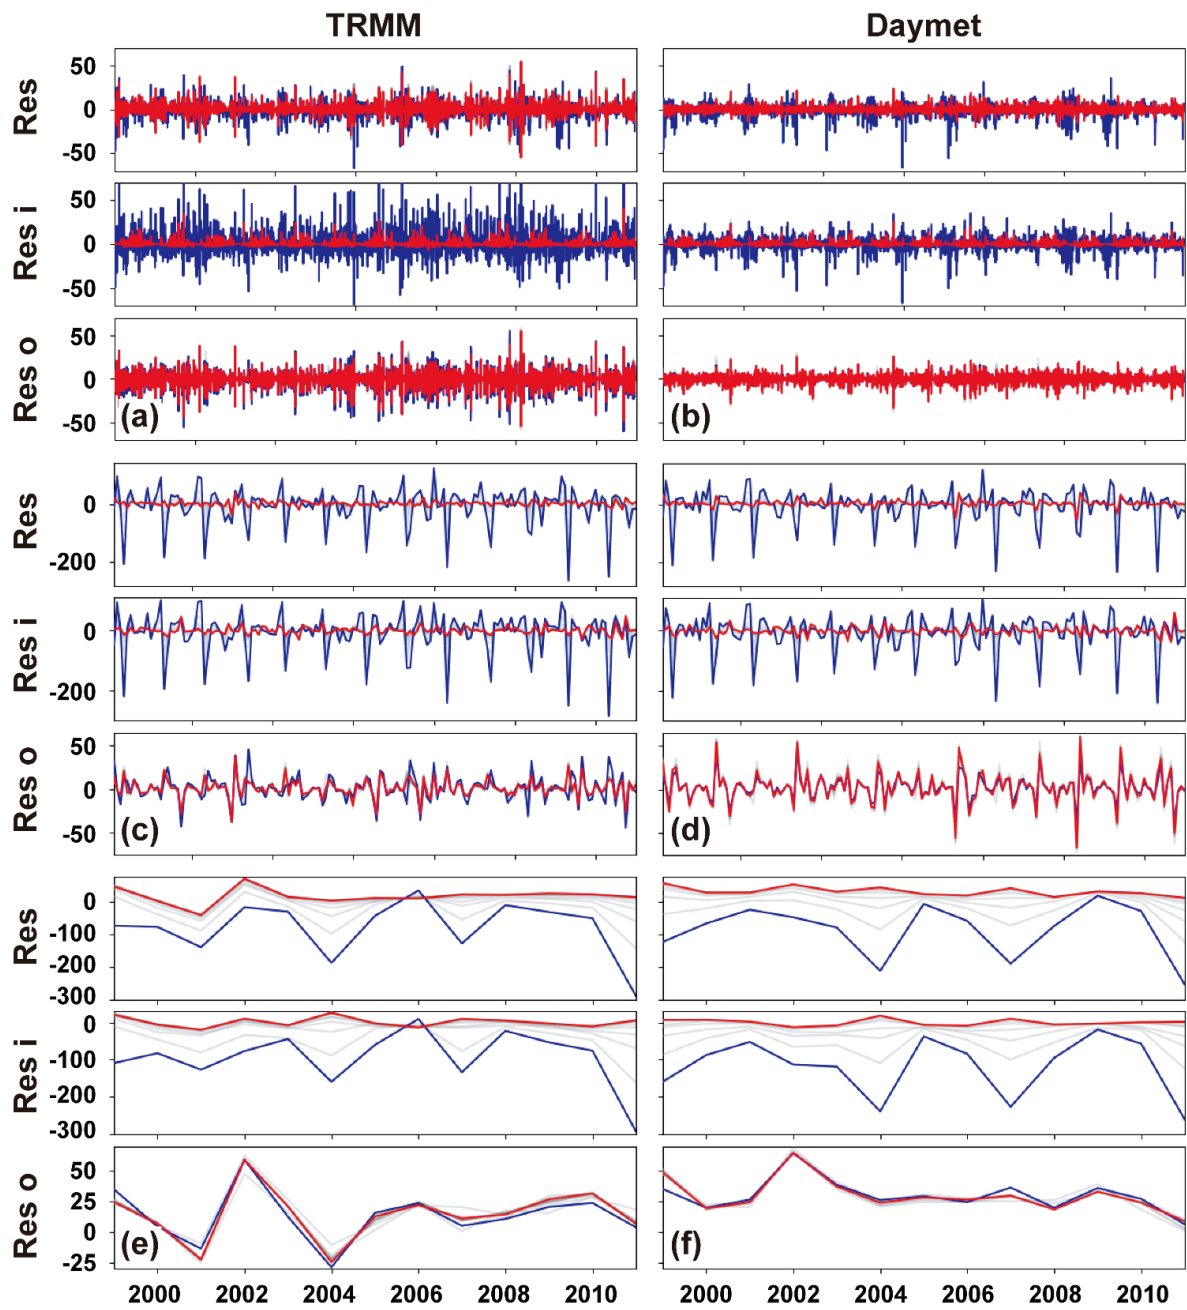

50 **Figure S16.** Comparison of correction results based on different forcing datasets (TRMM and Daymet) at basin 1013500. (a-b) Time series of three types of residuals at daily, (c-d) monthly, (e-f) and yearly timescales, respectively.

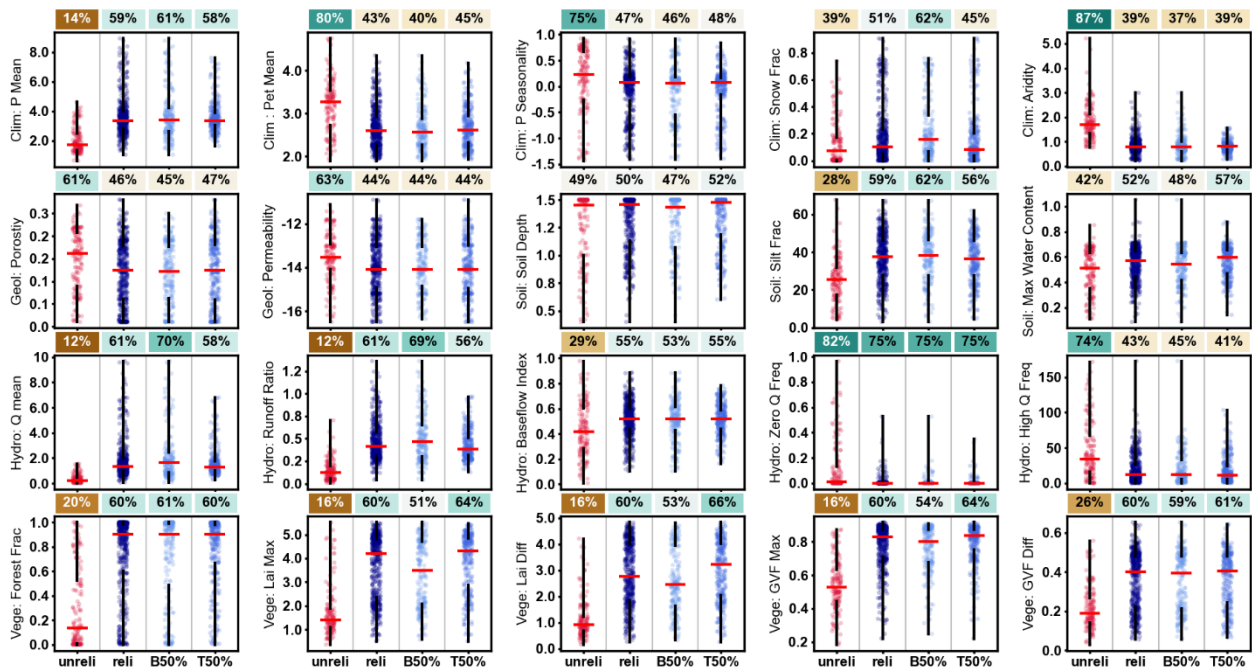

55 **Figure S17.** Grouping of basin characteristics based on model performance in runoff. Four groups labelled as “unreli”, “reli”, “B50%”, and “T50%” represent basin groupings characterized by unreliable simulations, reliable simulations, below-average model performance, and above-average model performance, respectively. The cumulative probability of the median value for each group is labelled at the top of each panel.

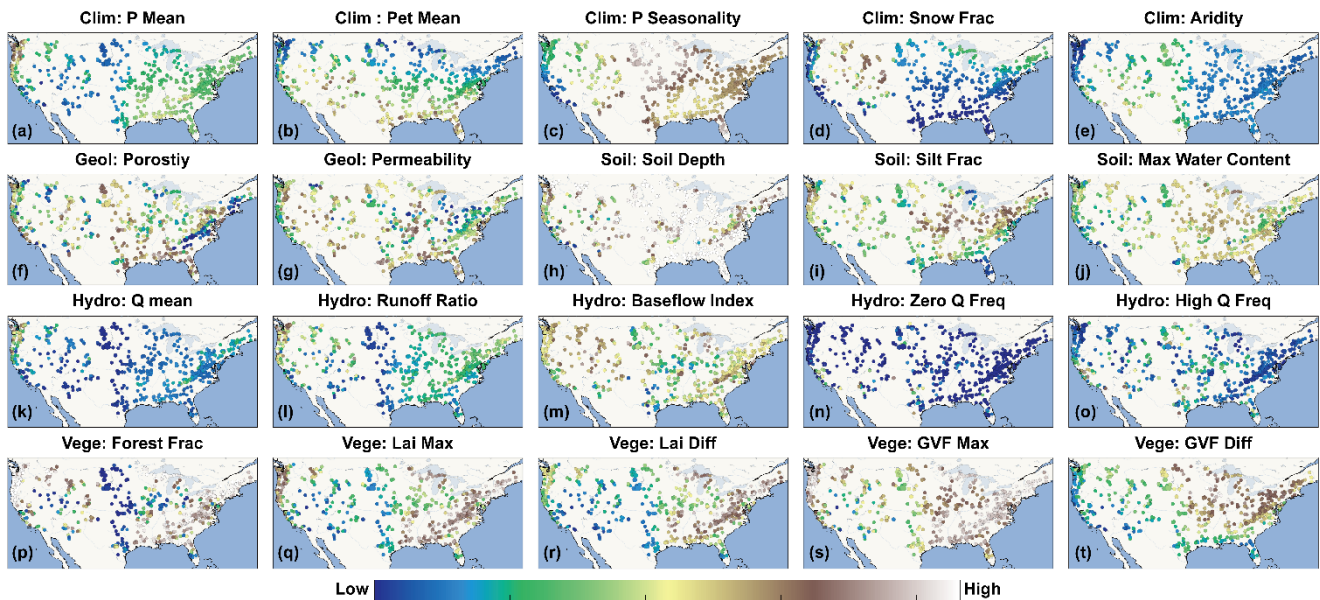

**Figure S18.** Spatial patterns of selected basin characteristics.
